# Supplementary material for: Fabrication of CuO–1.5ZrO2 composite thin film, from heteronuclear molecular complex and its electrocatalytic activity towards methanol oxidation
Source: Royal Society of Chemistry journal article supplement (doi:10.1039/c5ra18053h), 2015-01-01
Supplement: c5ra18053h1.pdf [file c5ra18053h1.pdf]

## Supplementary Material

### **Fabrication of CuO-1.5ZrO<sub>2</sub> composite thin film, from heteronuclear molecular complex and its electrocatalytic activity towards methanol oxidation**

*Muhammad Ali Ehsan,<sup>a</sup> Abbas Saeed Hakeem,<sup>a</sup> Hamid Khaledi,<sup>b</sup> Muhammad Mazhar,<sup>b\*</sup> Muhammad Mehmood Shahid,<sup>c</sup> Alagarsamy Pandikumar,<sup>c</sup> and Nay Ming Huang<sup>c</sup>*

[a] Center of Research Excellence in Nanotechnology (CENT), King Fahd University of Petroleum & Minerals, Saudia Arabia.

[b]\*Department of Chemistry, Faculty of Science, University of Malaya, Lembah Pantai, 50603-Kuala Lumpur, Malaysia.

[c] Department of Physics, Faculty of Science, University of Malaya, Lembah Pantai, 50603-Kuala Lumpur, Malaysia.

*\*Corresponding author's e-mail: mazhar42pk@yahoo.com, Tel.: +60379674269;*

Fax: +60379674193

### **Elemental Analysis of complex [Cu<sub>4</sub>Zr<sub>6</sub>(μ-O)<sub>8</sub>(dmap)<sub>4</sub>(OAc)<sub>12</sub>]•H<sub>2</sub>O (1)**

| Run Details |       |        |                     | Results |          |          | Messages |
|-------------|-------|--------|---------------------|---------|----------|----------|----------|
| Run         | Run # | Weight | Created on          | Carbon  | Hydrogen | Nitrogen | Messages |
| B2          | 21    | 1.516  | 2013-11-21 11:40 AM | 25.774  | 4.093    | 2.716    |          |

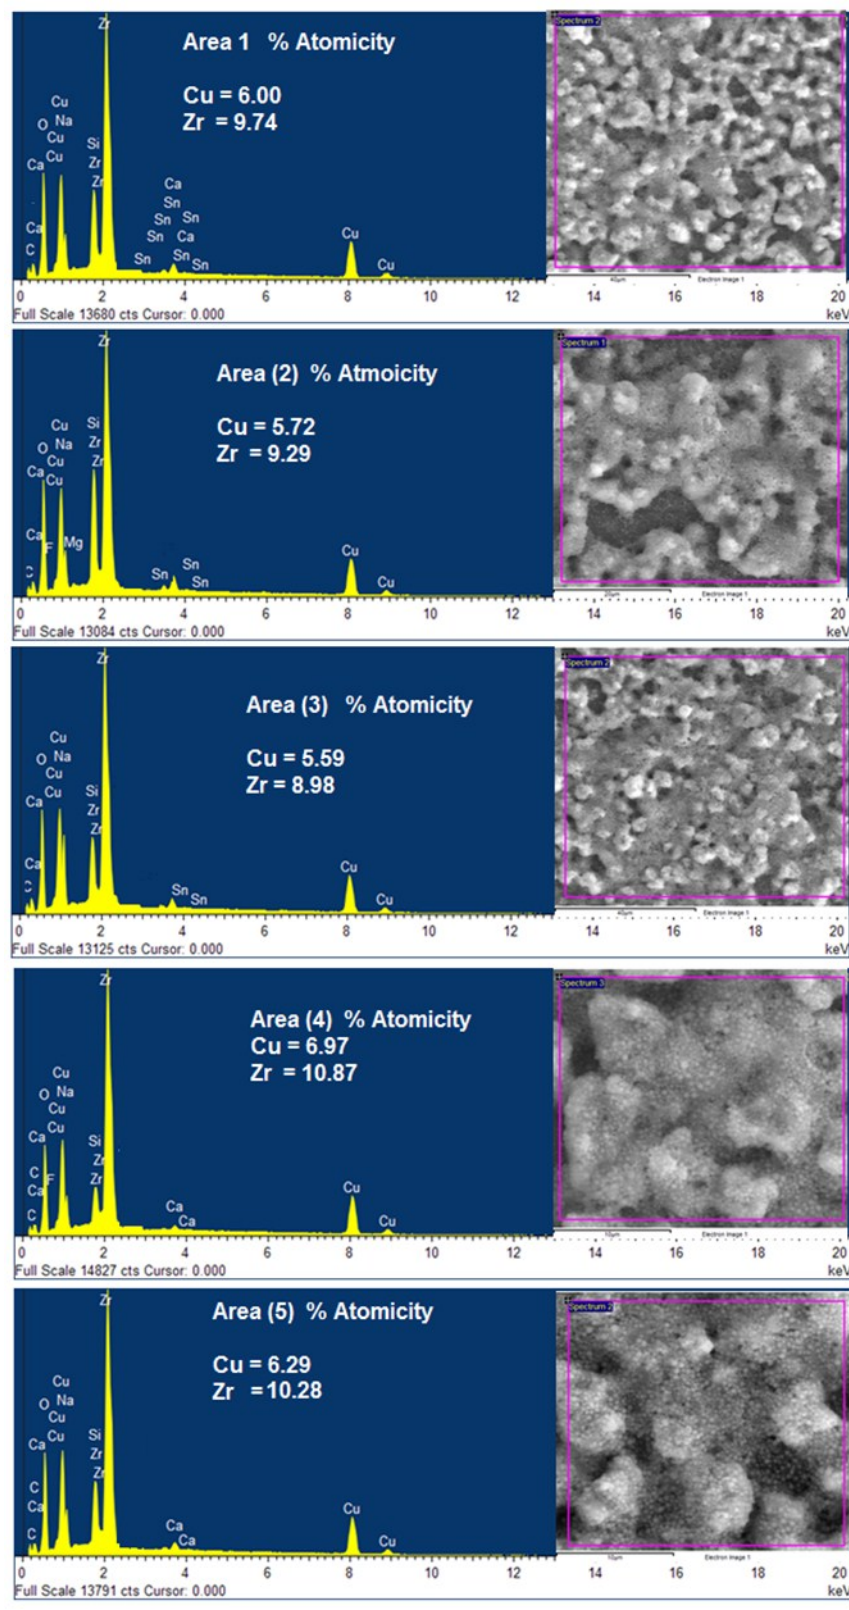

**Figure S1:** EDX spectrum recorded from different areas of CuO-1.5 ZrO<sub>2</sub> composite oxide film deposited from methanol solution of (1) on FTO substrate at 550 °C in air atmosphere.

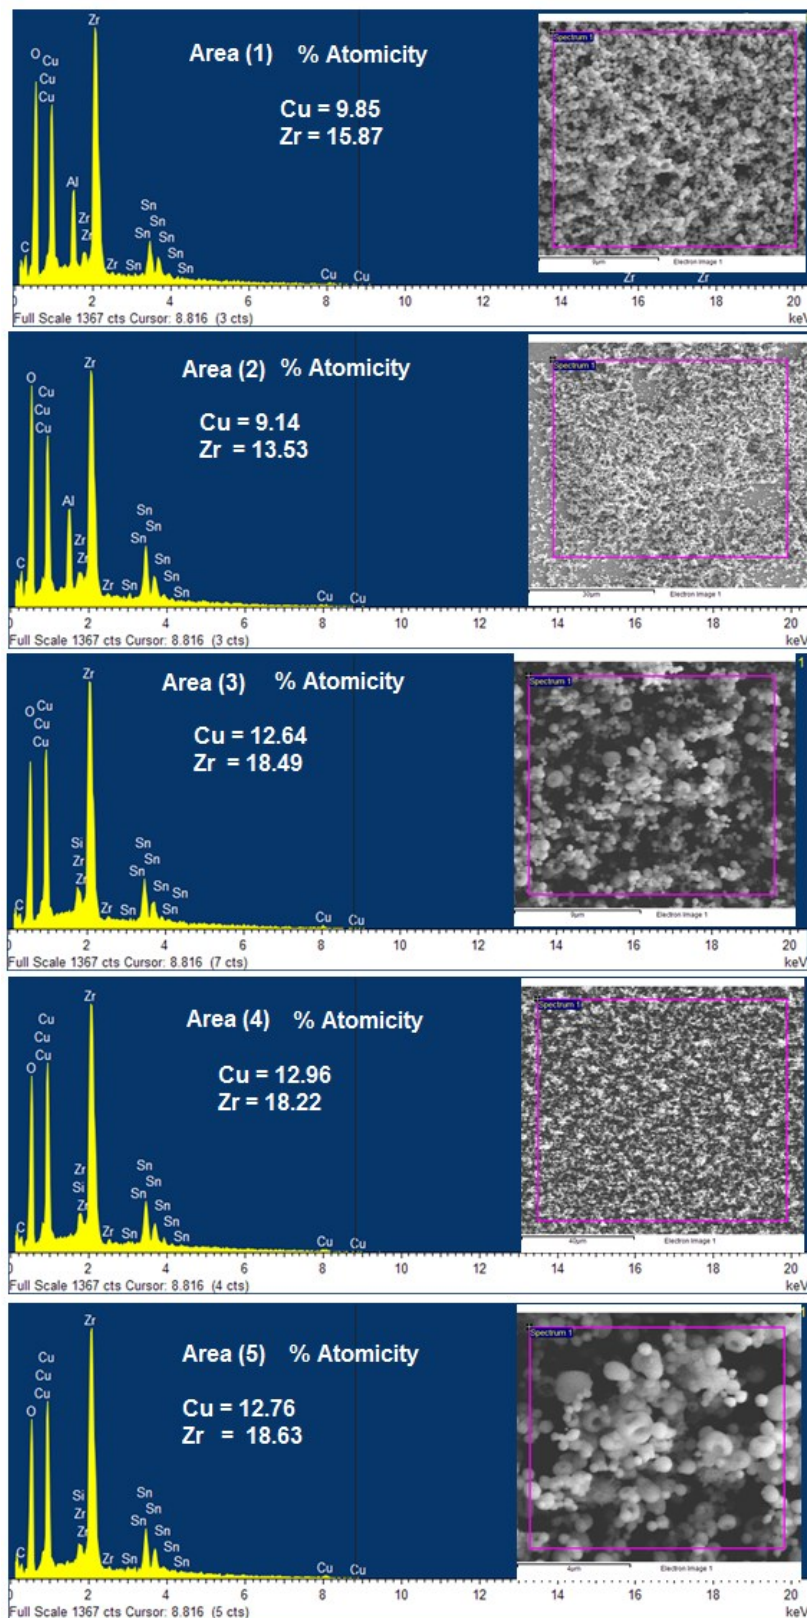

**Figure S2:** EDX spectrum recorded from different areas of CuO-1.5 ZrO<sub>2</sub> composite oxide film deposited from ethanol solution of (1) on FTO substrate at 550 °C in air atmosphere.
